# Supplementary material for: The Pacific harbor seal gut microbiota in Mexico: Its relationship with diet and functional inferences
Source: PLoS One. 2019 Aug 29;14(8):e0221770. doi: 10.1371/journal.pone.0221770 (PMC6715212; doi:10.1371/journal.pone.0221770)
Supplement: S2 Table — (XLSX) [file pone.0221770.s006.xlsx]

## Sheet: Hoja1
S2 Table. Comparison of the gut microbiota cores of the Pacific (present study) and Atlantic (Baltic study*) populations of harbor seal.
Family	Genera	Baltic Sea*	Baja California (present study)
Ruminococcaceae
	Oscillospira				Legend
	Faecalibacterium					Present in the core microbiota
Clostridiaceae						Present but not as part of the core microbiota
	Clostridium					Not present in the population
	Anaerotruncus
Bacteroidaceae
	Bacteroides
Fusobacteriaceae
	Fusobacterium
Rikenellaceae
	Alistipes
Paraprevotellaceae
	Prevotella
Erysipelotrichaceae
	Eubacterium dolichum
Lachnospiraceae
	Blautia
Coriobacteriaceae
	Atopobium
Oscillospiraceae
	Oscillibacter
Veillonellaceae
	Phascolarctobacterium
Alcaligenaceae
	Sutterella
Succinivibrionaceae
	Anaerobiospirillum
Enterobacteriaceae
	Escherichia-Shigella
Christensenellaceae
S24-7
Peptostreptococcaceae
* Numberger D, Herlemann DPR, Jürgens K, Dehnhardt G, Schulz-Vogt H. Comparative analysis of the fecal bacterial community of five harbor seals (Phoca vitulina). Microbiologyopen. 2016;5: 782–792. doi:10.1002/mbo3.369
